# Supplementary material
Source: PubMed Central journal article supplement (PMC3685848)
Supplement: NIHMS475694-supplement-online_supplement.pdf [file NIHMS475694-supplement-online_supplement.pdf]

## Supplemental Tables

**Supplementary Table 1.** Number of incident cancers, by demographic subgroups, ARIC study

| Subgroup (n)                 | Number incident cancer cases 1986-2006 | Percent of subgroup with incident cancer 1986-2006 |
|------------------------------|----------------------------------------|----------------------------------------------------|
| Women (7723)                 | 1343                                   | 18.6                                               |
| Men (6030)                   | 1537                                   | 25.5                                               |
| African Americans (3329)     | 672                                    | 20.2                                               |
| Whites (9924)                | 2208                                   | 22.3                                               |
| Age 44-49 at baseline (3611) | 517                                    | 14.3                                               |
| Age 50-54 at baseline (3425) | 690                                    | 20.1                                               |
| Age 55-59 at baseline (3245) | 784                                    | 24.2                                               |
| Age 60-66 at baseline (2972) | 889                                    | 29.9                                               |

**Supplementary Table 2.** Hazard ratios for incident cancers by number of ideal health metrics: The ARIC Study, 1987-2006

| # Ideal health metrics | Hazard Ratio for lung cancer (95% C.I)*† | Hazard Ratio for colorectal cancer (95% C.I)* † | Hazard Ratio for breast cancer (95% C.I)* † |
|------------------------|------------------------------------------|-------------------------------------------------|---------------------------------------------|
| 0                      | 1.0 (referent)                           | 1.0 (referent)                                  | 1.0 (referent)                              |
| 1                      | 0.46 (0.30-0.73)                         | 0.81 (0.41-1.59)                                | 0.69 (0.42-1.16)                            |
| 2                      | 0.42 (0.28-0.65)                         | 0.97 (0.50-1.86)                                | 0.71 (0.43-1.17)                            |
| 3                      | 0.37 (0.24-0.57)                         | 0.84 (0.44-1.63)                                | 0.59 (0.36-0.98)                            |
| 4                      | 0.27 (0.17-0.44)                         | 0.63 (0.31-1.25)                                | 0.60 (0.36-1.00)                            |
| 5                      | 0.18 (0.09-0.33)                         | 0.64 (0.30-1.37)                                | 0.68 (0.40-1.16)                            |
| 6-7                    | 0.04 (0.01-0.27)                         | 0.20 (0.04-0.91)                                | 0.52 (0.26-1.03)                            |

\*adjusted for age, sex, race, and ARIC center

†p-trend for the lung cancer association < .0001 , p-trend for the colorectal cancer association = .0092 , p-trend for the breast cancer association = .11

## Supplemental Figures

**Supplementary Figure 1.** Survival curves for combined cancer incidence by total number of ideal health metrics (with the ideal smoking metric omitted).

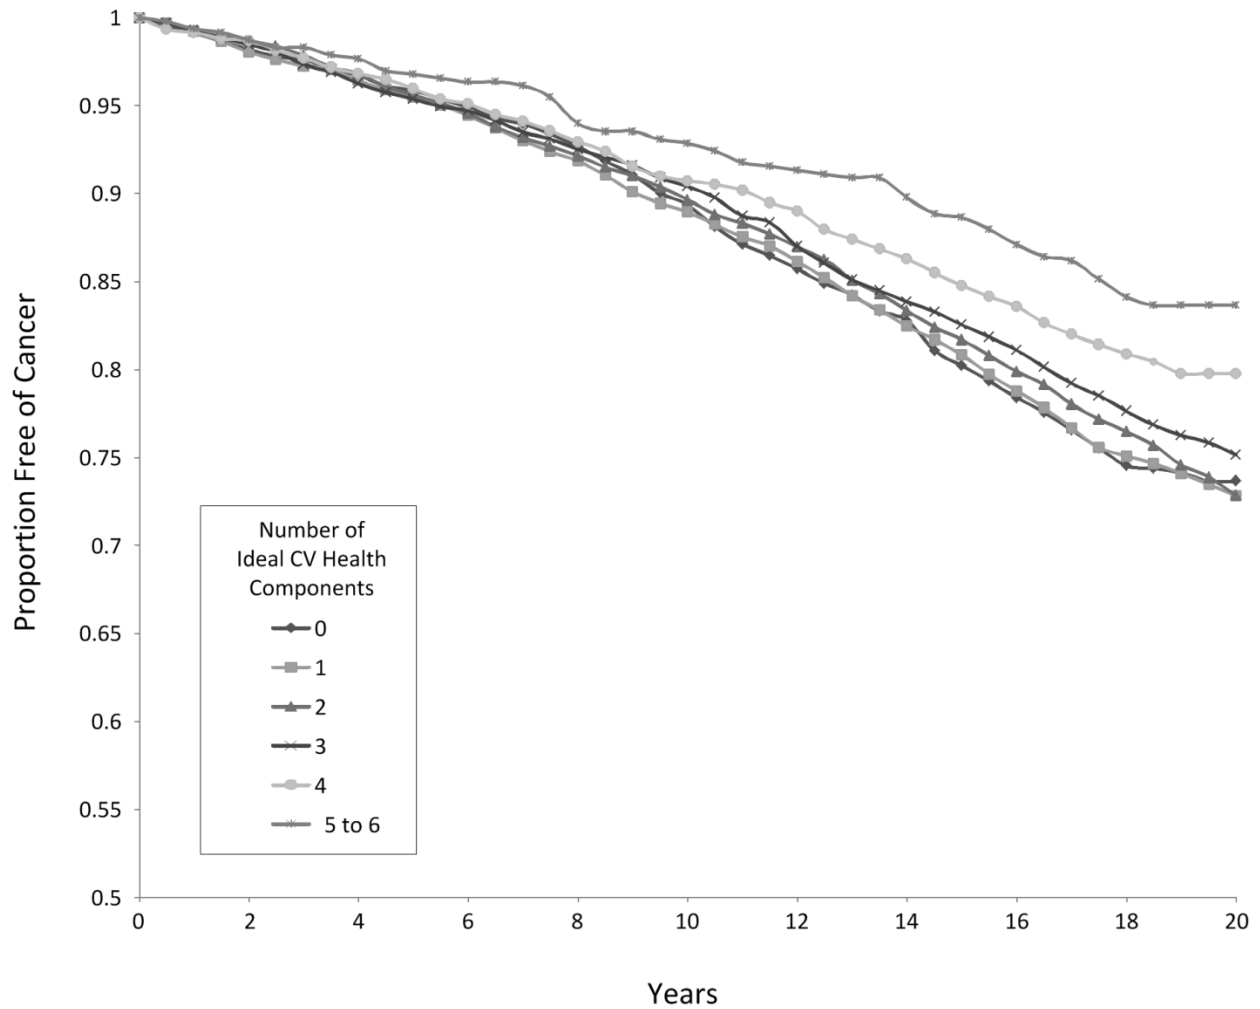

Cumulative cancer-free\* survival according to number of ideal health metrics (with ideal smoking metric omitted), ARIC study 1987-2006

\*Non-melanoma skin cancers were excluded from the combined cancer endpoint.
